# Supplementary material
Source: PubMed Central journal article supplement (PMC8329944)

# CONSORT 2010 Flow Diagram

Enrollment

Assessed for eligibility (n=70)

Excluded (n= 32)

- ♦ Not meeting inclusion criteria (n=12)
- ♦ Declined to participate (n=19)
- ♦ Other reasons (n=1)

Randomized (n=38)

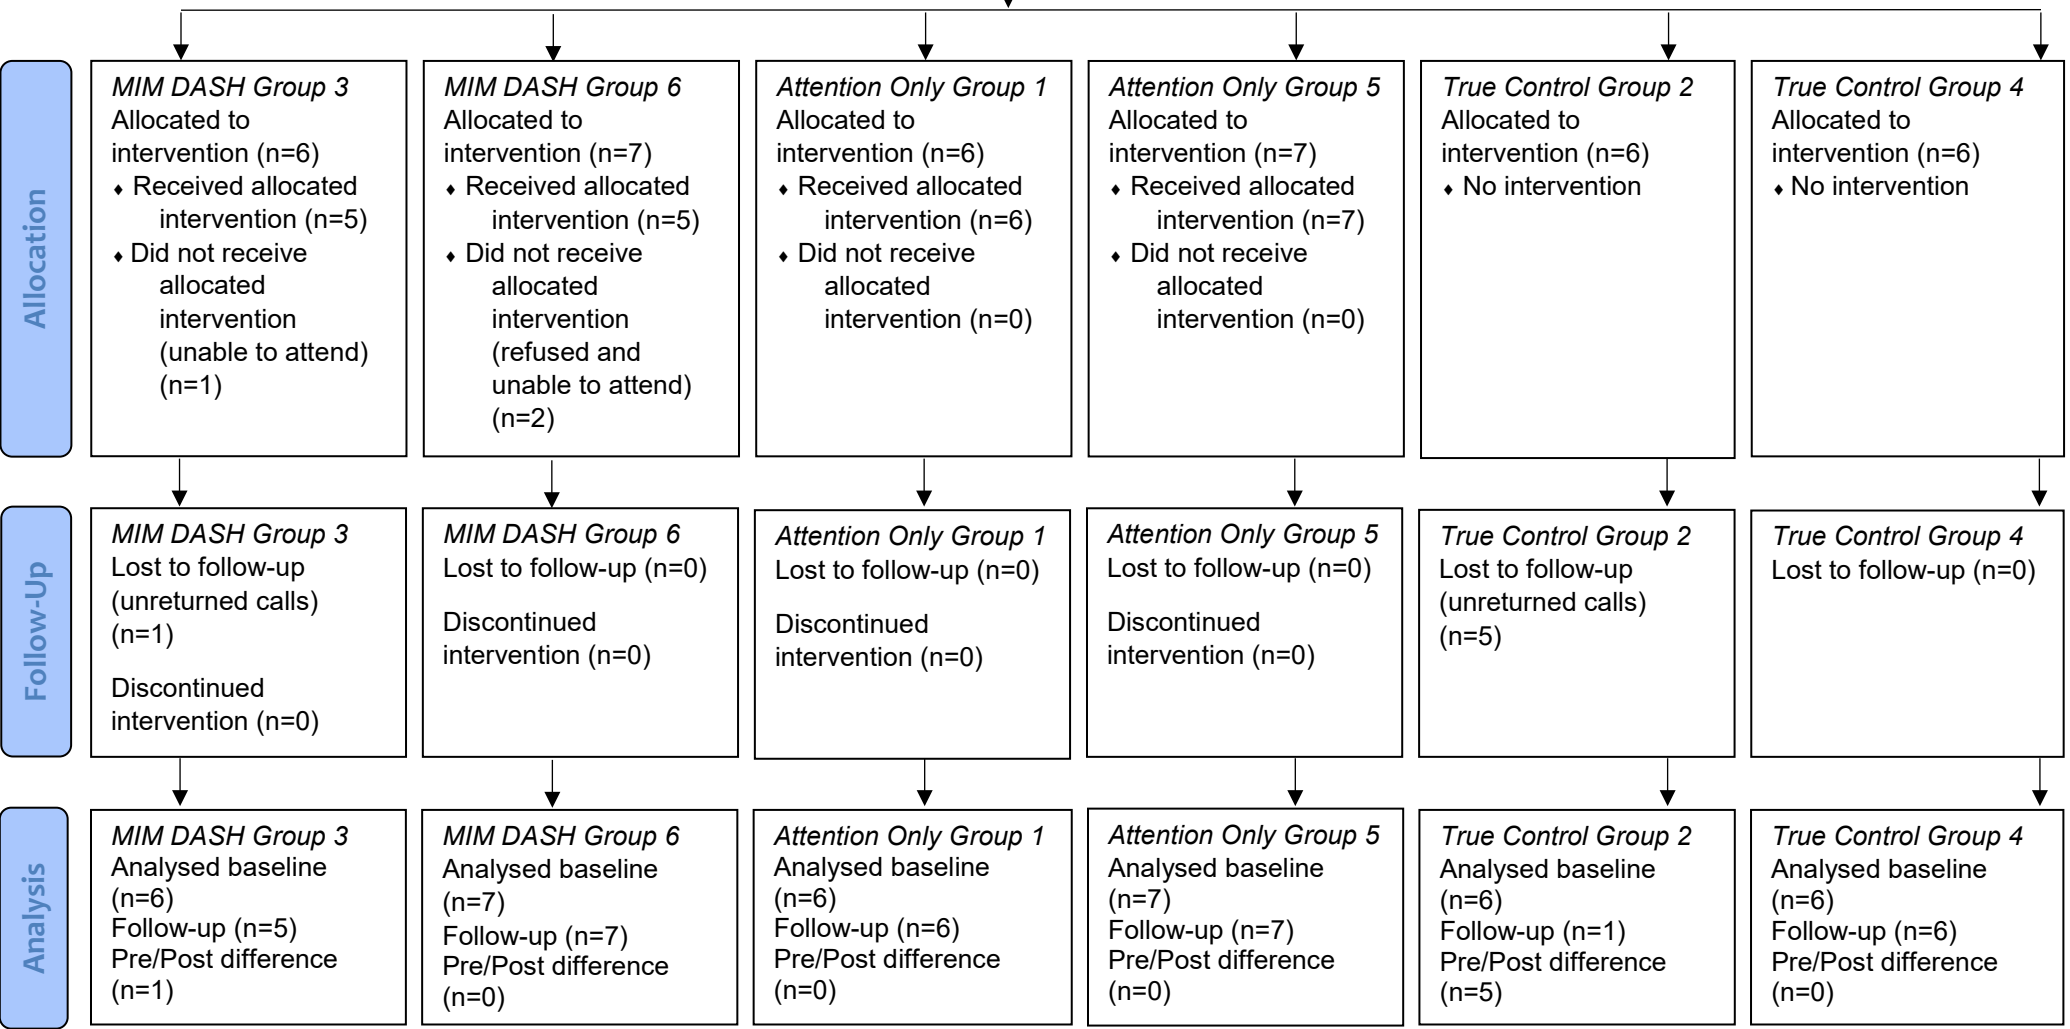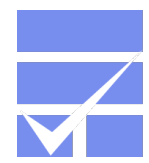

Supplement: NIHMS1721445-supplement-supinfo.pdf [file NIHMS1721445-supplement-supinfo.pdf]
